# Supplementary material
Source: PubMed Central journal article supplement (PMC6980305)
Supplement: NIHMS1060067-supplement-Appendix.pdf [file NIHMS1060067-supplement-Appendix.pdf]

**Since resolving your problem with alcohol or drugs**, how frequently have the following occurred because someone knew about your alcohol or drug history?

1. I was ignored
2. People assumed I was likely to relapse
3. People said I looked like an alcoholic or addict
4. People treated me less favorably
5. I was held to a higher standard
6. I was disrespected
7. I left a recovery or addiction treatment environment because I was treated unfairly
8. People perceived me as being dangerous
9. People treated me like a criminal
10. People assumed I could not provide for myself
11. People avoided me
12. It has been hard for me to get health insurance
13. People accused me of being dishonest
14. I lost my job
15. I was denied a loan or didn't even bother to apply
16. I was denied housing
17. I was denied food stamps
18. I was denied the right to vote
19. I could not get a job
20. I had a job but could not get a promotion
21. I was rejected by family or friends
22. I was treated unfairly by the police
23. I received inadequate medical treatment
24. My insurance would not cover some of my medical costs
25. I felt discriminated against

Answers in column:

- 1=Never
- 2=Once or twice
- 3=A few times
- 4=Often
